# Supplementary material for: Design and impact of a stoichiometry voluntary online course for entering first-year STEM college students
Source: Royal Society of Chemistry journal article supplement (doi:10.1039/d3rp00179b), 2023-08-10
Supplement: d3rp00179b1.pdf [file d3rp00179b1.pdf]

## Appendix A. Stoichiometry knowledge test

[X]: Muestra las respuestas correctas.

1. Cuál o cuáles de las siguientes aseveraciones son verdaderas:

- a) Un átomo está formado por un núcleo, que contiene protones y neutrones, y electrones fuera del núcleo. [X]
- b) La mayor parte del espacio que ocupa un átomo está ocupado por el núcleo que contiene gran parte de la masa atómica.
- c) En un átomo neutro, el número de protones es igual al número de electrones. [X]
- d) Los átomos se ordenan en la tabla periódica moderna de acuerdo a su masa.
- e) El número másico de un átomo, es igual al número de protones más neutrones que contiene su núcleo. [X]

Nota: Asegúrese de seleccionar todas las opciones correctas- puede haber más de una!

2. Indique cuál o cuales de estas afirmaciones es correcta:<<

- a) La masa de un átomo de hidrógeno es 1,0 gramo.
- b) Isótopos de un elemento difieren en su masa pues contienen distinto número de neutrones en el núcleo. [X]
- c) La masa del isótopo de carbono de número másico 12, el isótopo más abundante del carbono, es 12,011 unidades de masa atómica ( ese es el número que aparece en la Tabla Periódica para el Carbono).
- d) La masa de un mol de átomos de oxígeno es 16,0 unidades de masa atómica.
- e) En la Tabla periódica la masa atómica de un elemento es un promedio ponderado de las masas de todos los isótopos de ese elemento. [X]

Nota: Asegúrese de seleccionar todas las opciones correctas- puede haber más de una!

[explanation]

Si no contestó correctamente esta pregunta, revise con cuidado el capítulo 1 y 2. Revise las definiciones sobre isótopos y la primera parte del texto "Isótopos, la definición del elemento patrón y el mol" en este MOOC en que se discute cómo la masa atómica para los átomos en la Tabla Periódica está relacionada con ellos.

[explanation]

3. Cuando ocurre una reacción química se puede afirmar que:<<

- a) La masa se conserva [X]
- b) El número de moléculas se conserva
- c) El número de átomos se conserva [X]
- d) El número de moles se conserva

Nota: Asegúrese de seleccionar todas las opciones correctas-puede haber más de una!

[explanation]

En una reacción química se cumple la ley de conservación de la masa. Desde el punto de vista microscópico, son los átomos los que se conservan (no se crean ni se destruyen átomos en una reacción química, sólo se reordenan para formar los productos). Nota que la conservación de átomos asegura la conservación de la masa en una reacción química.

[explanation]

4. La ecuación química que representa la reacción de aluminio sólido,  $\text{Al}_{(s)}$ , con cloro gaseoso,  $\text{Cl}_{2(g)}$  para producir cloruro de aluminio sólido,  $\text{AlCl}_{3(s)}$ , es: <<

- a)  $\text{Al}_{(s)} + \text{Cl}_{2(g)} \rightarrow \text{AlCl}_{3(s)}$
- b)  $2 \text{Al}_{(s)} + 3 \text{Cl}_{2(g)} \rightarrow 2 \text{AlCl}_{3(s)}$ . [X]
- c)  $3 \text{Al}_{(s)} + 3 \text{Cl}_{2(g)} \rightarrow 3 \text{AlCl}_{3(s)}$
- d)  $3 \text{Al}_{(s)} + \text{Cl}_{2(g)} \rightarrow 4 \text{AlCl}_{3(s)}$

Nota: Asegúrese de seleccionar todas las opciones correctas-puede haber más de una!

[explanation]

Los átomos deben conservarse.

[explanation]

5. En un frasco de reacción se colocan 200 moléculas de  $\text{H}_2$  y 200 moléculas de  $\text{O}_2$  que reaccionan según:  $\text{H}_2 + \frac{1}{2} \text{O}_2 \rightarrow \text{H}_2\text{O}$ . Después de cierto tiempo  $t$  se observa que en el frasco hay 80 moléculas de  $\text{H}_2\text{O}$ .

Se puede afirmar que en ese instante, en el frasco hay:

- a) 80 moléculas de  $\text{H}_2$  y 40 moléculas de  $\text{O}_2$
- b) 280 moléculas de  $\text{H}_2$  y 240 moléculas de  $\text{O}_2$
- c) 120 moléculas de  $\text{H}_2$  y 160 moléculas de  $\text{O}_2$  [X]
- d) No se puede saber sino hasta que termine la reacción.

[explanation]

Si se formaron 80 moléculas de agua deben necesariamente haber reaccionado 80 moléculas de  $\text{H}_2$  y 40 moléculas de  $\text{O}_2$ . Por lo tanto deben quedar  $(200-80)=120$  moléculas de  $\text{H}_2$  y  $(200-40)=160$  moléculas de  $\text{O}_2$

[explanation]

6. Un mol de moléculas de agua,  $\text{H}_2\text{O}$ , y un mol de moléculas de  $\text{O}_2$

- a) Tienen la misma masa
- b) Contienen una molécula de cada uno
- c) Tienen una masa de 1 gramo cada uno
- d) Contienen el mismo número de moléculas [X]

[explanation]

Siendo un mol una cantidad fija de unidades , entonces en un mol de distintos compuestos hay siempre el mismo número de unidades de ese compuesto.

[explanation]

7. Una molécula de azufre contiene 8 átomos de azufre,  $S_8$  . Entonces, un mol de moléculas de azufre contendrán

- a) 8 gramos de azufre
- b) 8 moles de átomos de azufre. [X]
- c)  $6,02 \cdot 10^{23}$  átomos de azufre
- d) 8 átomos de azufre

[explanation]

Siendo un mol una cantidad fija de unidades , entonces en un mol de  $S_8$  hay 8 moles de átomos de S.

[explanation]

8. El amoníaco,  $NH_3$ , puede ser preparado por la reacción entre Nitrógeno ( $N_2$ ) e hidrógeno  $H_2$ , según  $N_{2(g)} + 3 H_{2(g)} \rightarrow 2 NH_{3(g)}$ . Cuántos moles de hidrógeno son necesarios para preparar 1 mol de amoníaco? ( suponga que hay disponible todo el nitrógeno que necesite).

- a) 1
- b)  $3/2$  [X]
- c)  $2/3$
- d) 3
- e) 2

9. Cuando metano,  $CH_4$ , reacciona con oxígeno, ( $O_2$ ), se forma agua,  $H_2O$ , y dióxido de carbono ( $CO_2$ ). Cuántos gramos de metano son necesarios para producir 110 gramos de  $H_2O$ ?

- a) 55 gramos
- b) 110 gramos
- c) 49 gramos [X]
- d) 30 gramos
- e) 3 gramos

10. El aluminio reacciona con cloruro de hidrógeno para producir cloruro de aluminio e hidrógeno según:  $2 Al_{(s)} + 6 HCl_{(g)} \rightarrow 2 AlCl_{3(s)} + 3 H_{2(g)}$ . Calcular la masa de cloruro de aluminio que se forma cuando 2,70 gramos de aluminio reaccionan con 4,00 gramos de cloruro de hidrógeno.

- a) 4,93 gramos
  - b) 13,3 gramos
  - c) 2,70 gramos
  - d) 1,70 gramos
  - e) 4,00 gramos
- [X]
