# Supplementary material for: Design and impact of a stoichiometry voluntary online course for entering first-year STEM college students
Source: Royal Society of Chemistry journal article supplement (doi:10.1039/d3rp00179b), 2023-08-10
Supplement: d3rp00179b2.pdf [file d3rp00179b2.pdf]

## Appendix B- Script used to run the PSA

**VOIS\_C: 1** This variable represents whether a student is part of the EXP II group or not. It takes a value of 1 if the student is in the EXP II treatment group and 0 if the student is part of the control group.

**TREATMENT:** It takes a value of 1 if the student is in the treatment group and 0 if not.

**VOIS\_P:** This variable represents whether a student is part of the EXP I group. It takes a value of 1 if the student is in the EXP I group and 0 otherwise.

**CHEMISTRY:** This variable represents the grades obtained by students in the general chemistry course during the first semester. It likely takes numeric values indicating students' performance or achievement level in this course.

**RANKING**

**HSGRADES**

**NUST\_LAN**

**NUST\_MATH**

**NUST\_SCI**

**FEMALE**

---

Tab TREATMENT

```
pbalchk TREATMENT RANKING HSGRADES NUST_LAN NUST_MATH NUST_SCI  
FEMALE
```

```
logit TREATMENT RANKING HSGRADES NUST_LAN NUST_MATH NUST_SCI  
FEMALE
```

```
predict phat
```

```
sum phat if TREATMENT ==1
```

```
sum phat if TREATMENT ==0
```

```
drop if phat < .0157797    # 1 observations deleted (
```

```
drop if phat > .3045924    # 2 observations deleted
```

```
gen cheweight if TREATMENT =1  # 1,229 missing value generated
```

```
replace cheweight =phat/(1-phat) if TREATMENT ==0
```

```
sum cheweight  # check wight value Min=0.0169 MAX =1
```

```
pbalchk TREATMENT RANKING HSGRADES NUST_LAN NUST_MATH NUST_SCI  
FEMALE, wt(cheweight)
```

reg CHEMISTRY TREATMENT [pw= chweight]

---
